# Supplementary material for: Synthesis and Systematic Study on the Effect of Different PEG Units on Stability of PEGylated, Integrin-αvβ6-Specific A20FMDV2 Analogues in Rat Serum and Human Plasma
Source: MDPI journal article supplement (doi:10.3390/molecules27144331), 2022-07-06
Supplement: s1 [file s1]

Supplementary Information

# Synthesis and Systematic Study on the Effect of Different PEG units on Stability of PEGylated, Integrin $\alpha v\beta 6$ -Specific A20FMDV2 Analogues in Rat Serum and Human Plasma

Kuo-yuan Hung <sup>1</sup>, Renata Kowalczyk <sup>1,\*</sup>, Ami Desai <sup>2</sup>, Margaret A. Brimble <sup>1,3,4</sup>, John F. Marshall <sup>2,\*</sup> and Paul W. R. Harris <sup>1,3,4,\*</sup>

<sup>1</sup> The School of Chemical Sciences, University of Auckland, 23 Symonds St, Auckland 1010, New Zealand; hungkuoyuan@gmail.com (K.-y.H.); r.kowalczyk@auckland.ac.nz (R.K.); m.brimble@auckland.ac.nz (M.A.B.)

<sup>2</sup> Centre for Tumour Biology, Barts Cancer Institute-Cancer Research UK Centre of Excellence, Queen Mary University of London, Charterhouse Square, London, UK; ami\_desai89@hotmail.com (A.D.)

<sup>3</sup> Maurice Wilkins Centre for Molecular Biodiscovery, University of Auckland, Private Bag 92019, Auckland 1010, New Zealand

<sup>4</sup> The School of Biological Sciences, University of Auckland, 3A Symonds St, Auckland 1010, New Zealand

\* Correspondence: j.f.marshall@qmul.ac.uk (J.F.M.); paul.harris@auckland.ac.nz (P.W.R.H.)

## Structure, RP-HPLC and MS profile of synthetic peptides 13-30

## NAVPNLRGDLQVLAQKVART-OH (13) (A20FMDV2)

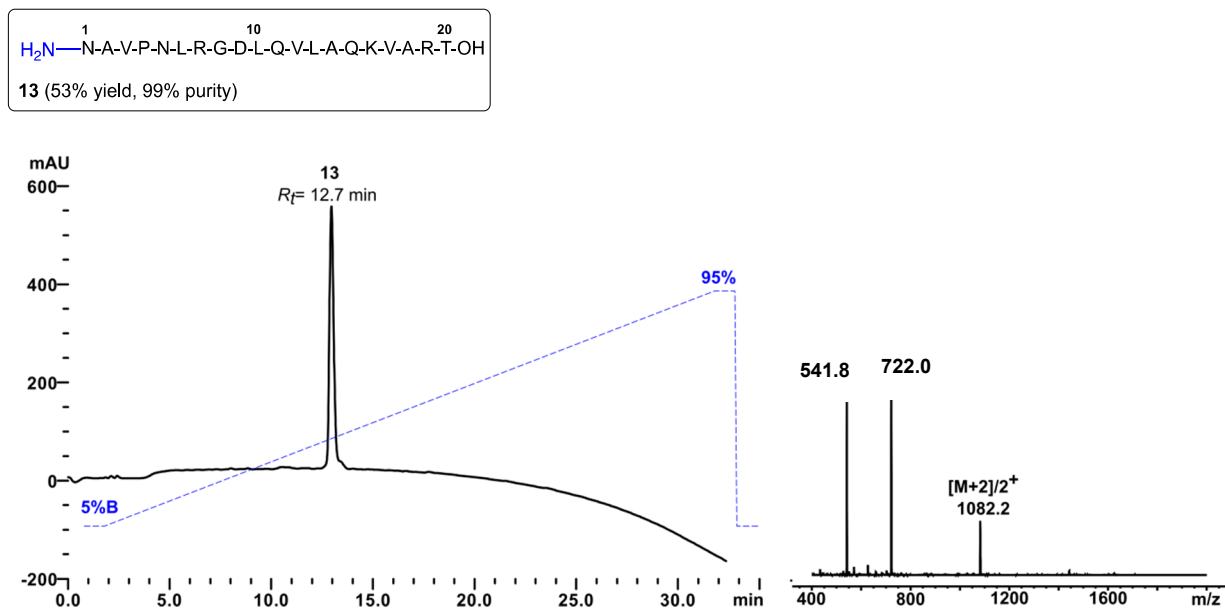

**Figure S1.** HPLC and MS traces of pure peptide 13 (*ca* 99% as judged by peak area of RP-HPLC at 210 nm, 53% yield).  $R_t$  12.7 min;  $m/z$  541.8  $[M + 4H]^{4+}$  requires 541.9,  $m/z$  722.0  $[M + 3H]^{3+}$  requires 722.2,  $m/z$  1082.2  $[M + 2H]^{2+}$  requires 1082.8. Mass deconvolution calculated at 2162.87 Da with standard deviation of 0.42; theoretical mass calculated at 2163.50 Da.

 $\text{H}_2\text{N-PEG}_1\text{-CH}_2\text{CO-NAVPNLRGDLQVLAQKVART-OH}$  (14)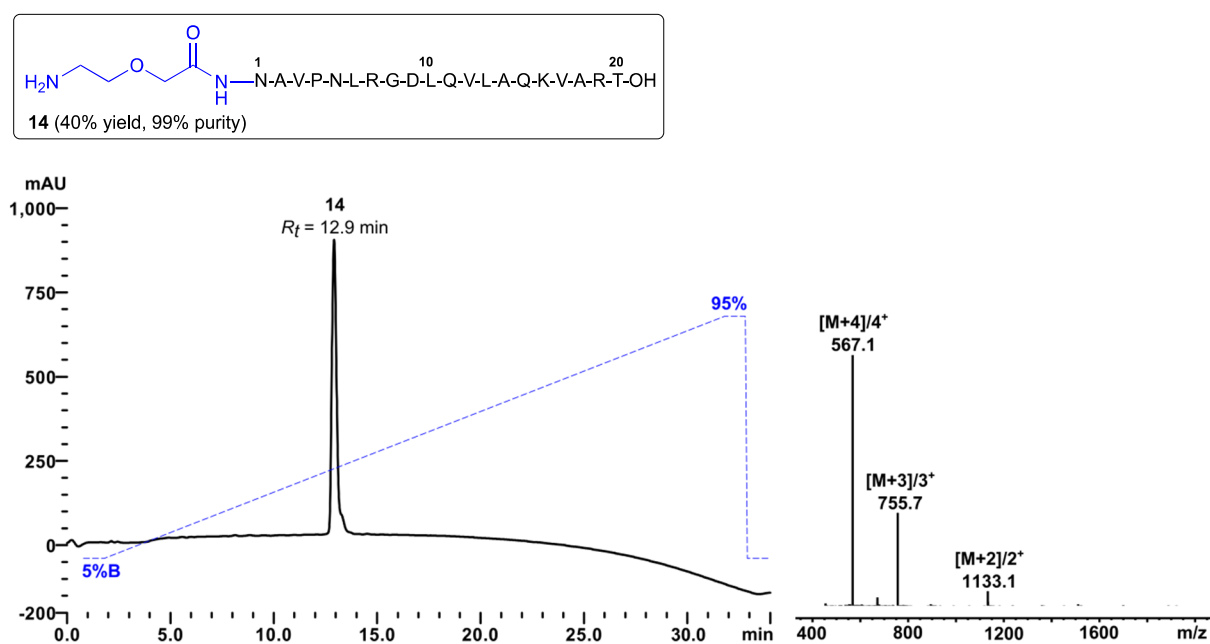

**Figure S2.** HPLC and MS traces of pure peptide 14 (*ca* 99% as judged by peak area of RP-HPLC at 210 nm, 40% yield).  $R_t$  12.9 min;  $m/z$  567.1  $[M + 4H]^{4+}$  requires 567.2,  $m/z$  755.7  $[M + 3H]^{3+}$  requires 755.9,  $m/z$  1133.1  $[M + 2H]^{2+}$  requires 1133.3. Mass deconvolution calculated at 2264.23 Da with standard deviation of 0.15; theoretical mass calculated at 2264.62 Da.

**H<sub>2</sub>N-PEG<sub>2</sub>-CH<sub>2</sub>CO-NAVPNLRGDLQVLAQKVART-OH (15)**

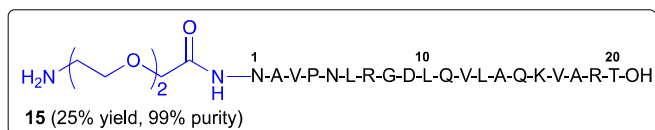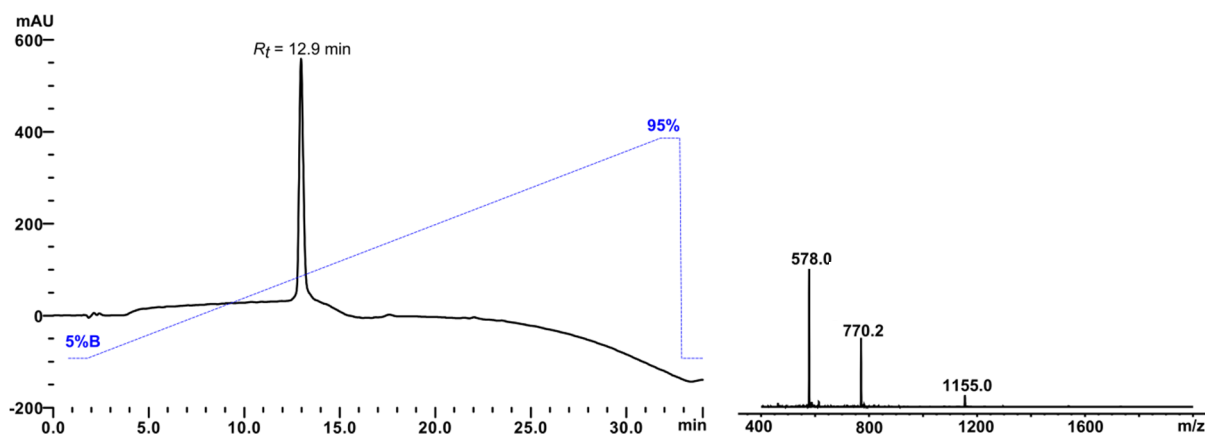

**Figure S3.** HPLC and MS traces of pure peptide 15 (*ca* 99% as judged by peak area of RP-HPLC at 210 nm, 25% yield).  $R_t$  12.9 min;  $m/z$  578.0  $[M + 4H]^{4+}$  requires 578.2,  $m/z$  770.2  $[M + 3H]^{3+}$  requires 770.6,  $m/z$  1155.0  $[M + 2H]^{2+}$  requires 1155.3. Mass deconvolution calculated at 2307.87 Da with standard deviation of 0.23; theoretical mass calculated at 2308.67 Da.

**H<sub>2</sub>N-PEG<sub>3</sub>-CH<sub>2</sub>CO-NAVPNLRGDLQVLAQKVART-OH (16)**

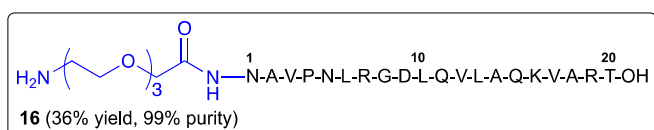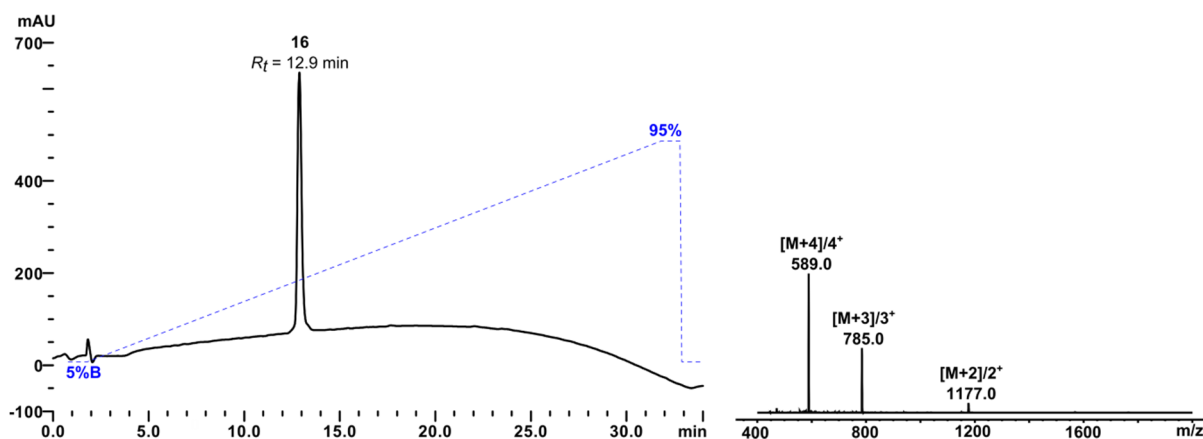

**Figure S4.** HPLC and MS traces of pure peptide 16 (*ca* 99% as judged by peak area of RP-HPLC at 210 nm, 36% yield).  $R_t$  12.9 min;  $m/z$  589.0  $[M + 4H]^{4+}$  requires 589.2,  $m/z$  785  $[M + 3H]^{3+}$  requires 785.3,  $m/z$  1177.0  $[M + 2H]^{2+}$  requires 1177.4. Mass deconvolution calculated at 2352.00 Da with standard deviation of 0.00; theoretical mass calculated at 2352.73 Da.

### H<sub>2</sub>N-PEG<sub>4</sub>-CH<sub>2</sub>CO-NAVPNLRGDLQVLAQKVART-OH (17)

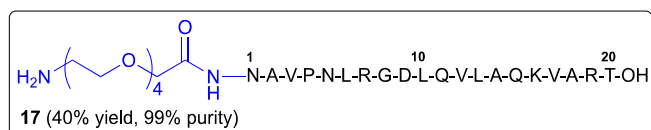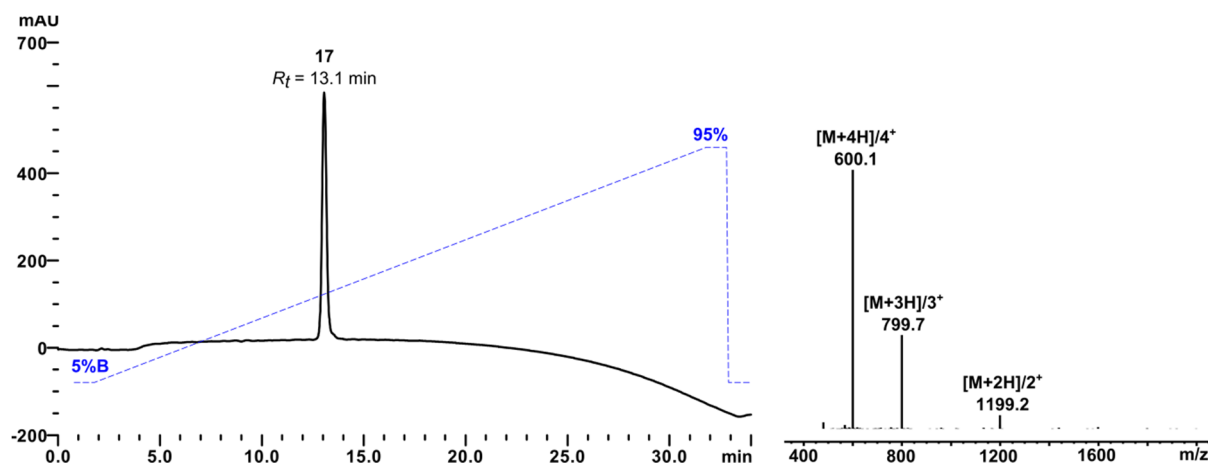

**Figure S5.** HPLC and MS traces of pure peptide 17 (*ca* 99% as judged by peak area of RP-HPLC at 210 nm, 40% yield).  $R_t$  13.1 min;  $m/z$  600.1  $[M + 4H]^{4+}$  requires 600.2,  $m/z$  799.7  $[M + 3H]^{3+}$  requires 799.9,  $m/z$  1199.2  $[M + 2H]^{2+}$  requires 1199.4. Mass deconvolution calculated at 2396.30 Da with standard deviation of 0.17; theoretical mass calculated at 2396.78 Da.

### H<sub>2</sub>N-PEG<sub>5</sub>-CH<sub>2</sub>CO-NAVPNLRGDLQVLAQKVART-OH (18)

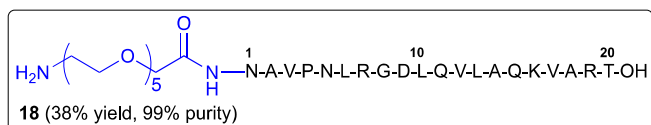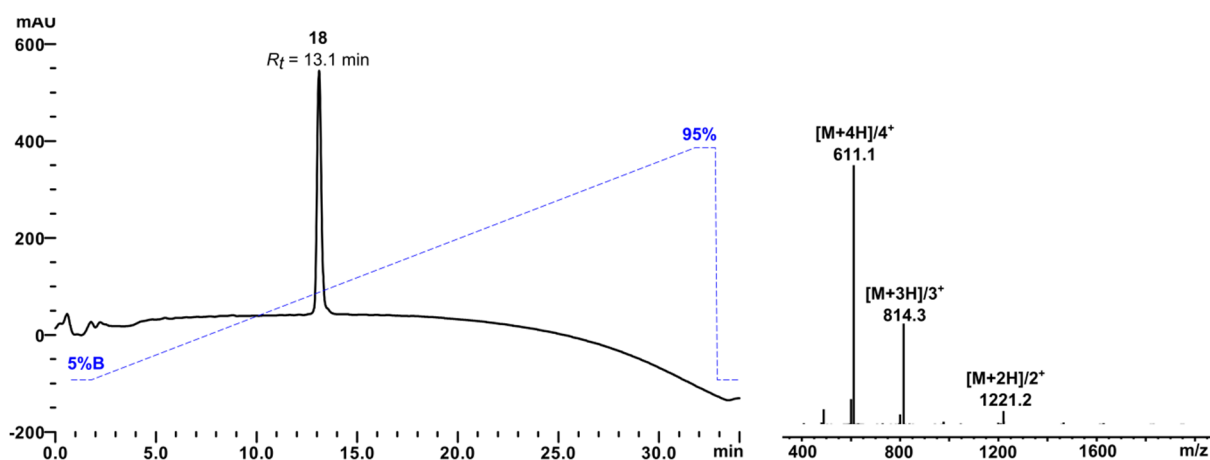

**Figure S6.** HPLC and MS traces of pure peptide 18 (*ca* 99% as judged by peak area of RP-HPLC at 210 nm, 38% yield).  $R_t$  13.1 min;  $m/z$  611.1  $[M + 4H]^{4+}$  requires 611.2,  $m/z$  814.3  $[M + 3H]^{3+}$  requires 814.6,  $m/z$  1221.2  $[M + 2H]^{2+}$  requires 1221.4. Mass deconvolution calculated at 2440.23 Da with standard deviation of 0.29; theoretical mass calculated at 2440.83 Da.

**H<sub>2</sub>N-PEG<sub>8</sub>-CH<sub>2</sub>CO-NAVPNLRGDLQVLAQKVART-OH (19)**

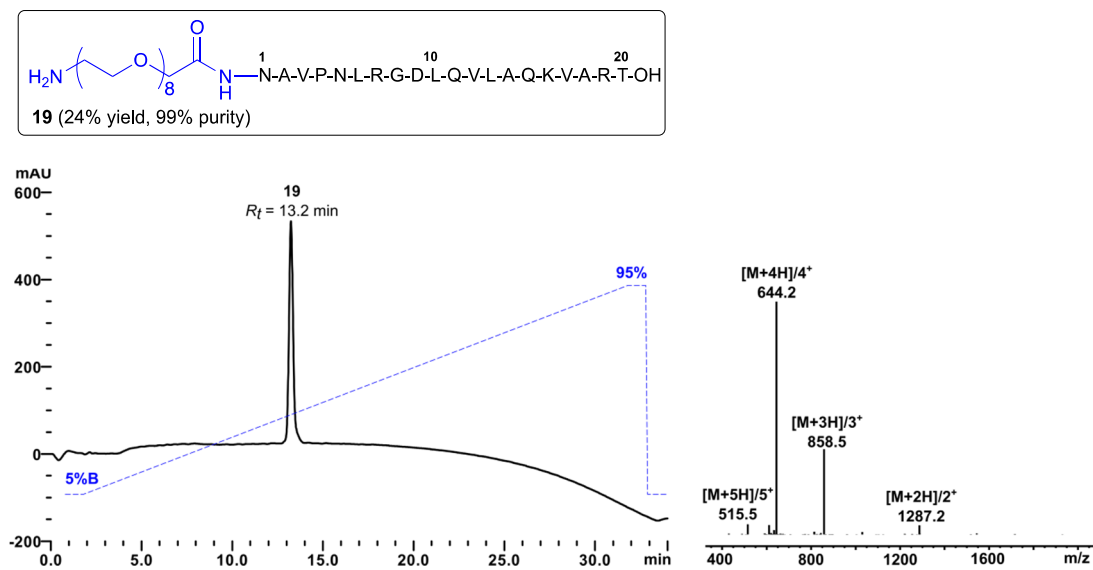

**Figure S7.** HPLC and MS traces of pure peptide 19 (*ca* 99% as judged by peak area of RP-HPLC at 210 nm, 24% yield).  $R_t$  13.2 min;  $m/z$  515.5  $[M+5H]^+/5^+$  requires 515.6,  $m/z$  644.2  $[M+4H]^+/4^+$  requires 644.3,  $m/z$  858.5  $[M+3H]^+/3^+$  requires 858.7,  $m/z$  1287.2  $[M+2H]^+/2^+$  requires 1287.5. Mass deconvolution calculated at 2572.55 Da with standard deviation of 0.17; theoretical mass calculated at 2572.99 Da.

**H<sub>2</sub>N-PEG<sub>5</sub>-CH<sub>2</sub>CH<sub>2</sub>CO-NAVPNLRGDLQVLAQKVART-OH (20)**

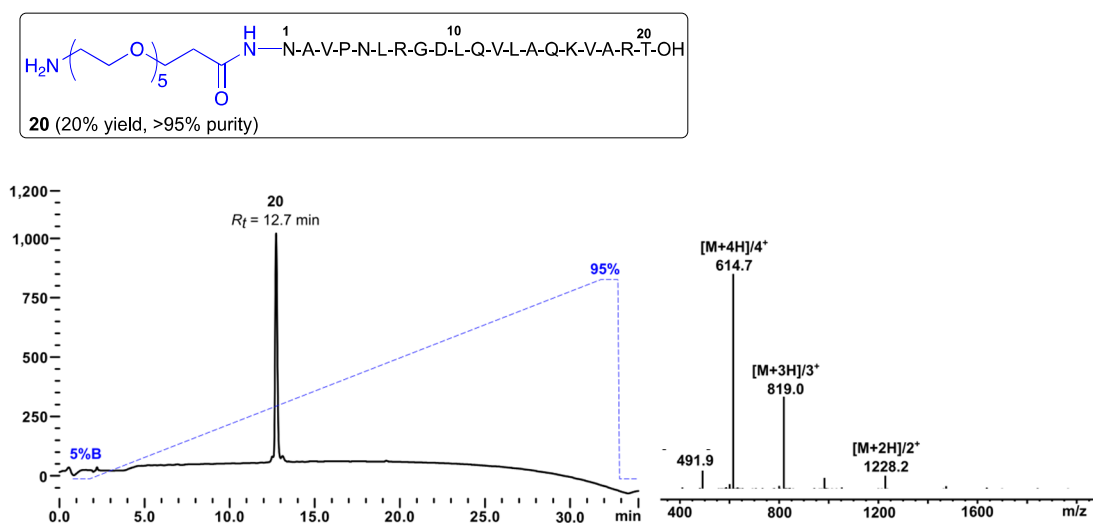

**Figure S8.** HPLC and MS traces of pure peptide 20 (>95% as judged by peak area of RP-HPLC at 210 nm, 20% yield).  $R_t$  12.7 min;  $m/z$  491.9  $[M+5H]^+/5^+$  requires 492.0,  $m/z$  614.7  $[M+4H]^+/4^+$  requires 614.7,  $m/z$  819.0  $[M+3H]^+/3^+$  requires 819.3,  $m/z$  1228.2  $[M+2H]^+/2^+$  requires 1228.4. Mass deconvolution calculated at 2454.43 Da with standard deviation of 0.17; theoretical mass calculated at 2454.86 Da.

**H<sub>2</sub>N-PEG<sub>10</sub>-CH<sub>2</sub>CH<sub>2</sub>CO-NAVPNLRGDLQVLAQKVART-OH (21)**

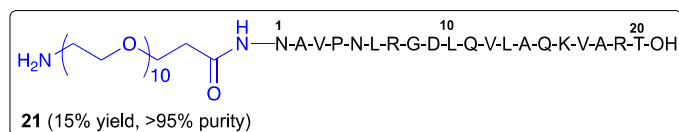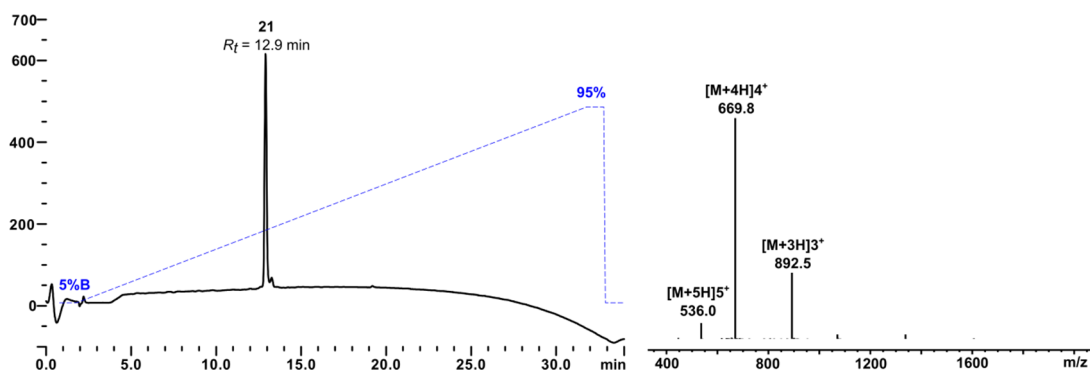

**Figure S9.** HPLC and MS traces of pure peptide 21 (>95% as judged by peak area of RP-HPLC at 210 nm, 15% yield).  $R_t$  12.9 min;  $m/z$  536.0  $[M + 5H]^{5+}$  requires 536.0,  $m/z$  669.8  $[M + 4H]^{4+}$  requires 669.8,  $m/z$  892.5  $[M + 3H]^{3+}$  requires 892.7. Mass deconvolution calculated at 2674.90 Da with standard deviation of 0.36; theoretical mass calculated at 2675.12 Da.

**H<sub>2</sub>N-PEG<sub>15</sub>-CH<sub>2</sub>CH<sub>2</sub>CO-NAVPNLRGDLQVLAQKVART-OH (22)**

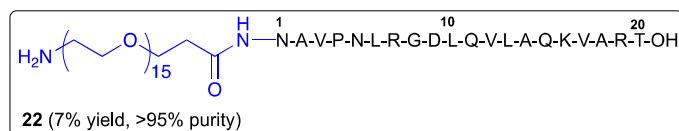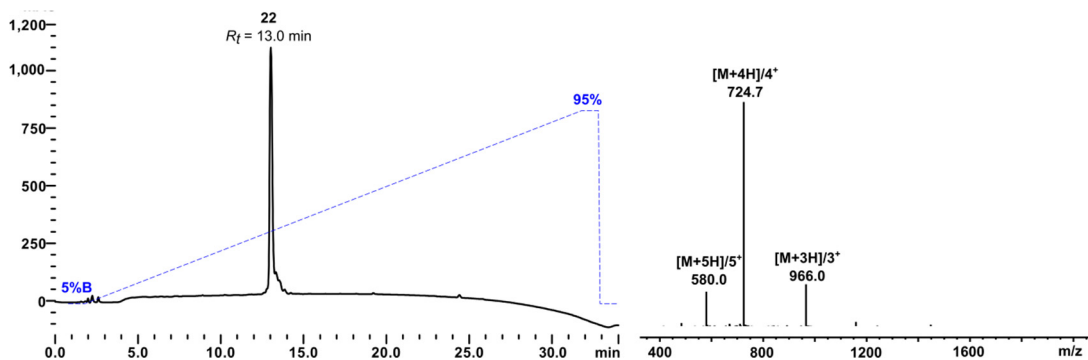

**Figure S10.** HPLC and MS traces of pure peptide 22 (>95% as judged by peak area of RP-HPLC at 210 nm, 7% yield).  $R_t$  13.0 min;  $m/z$  580.0  $[M + 5H]^{5+}$  requires 580.1,  $m/z$  724.7  $[M + 4H]^{4+}$  requires 724.8,  $m/z$  966.0  $[M + 3H]^{3+}$  requires 966.1. Mass deconvolution calculated at 2894.93 Da with standard deviation of 0.12; theoretical mass calculated at 2895.36 Da.

**H<sub>2</sub>N-PEG<sub>20</sub>-CH<sub>2</sub>CH<sub>2</sub>CO-NAVPNLRGDLQVLAQKVART-OH (23)**

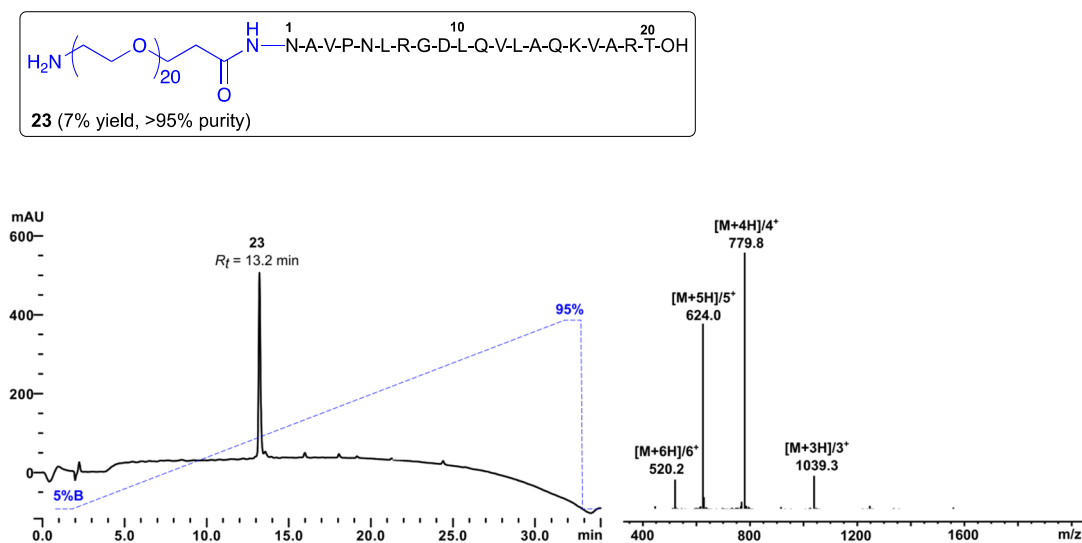

**Figure S11.** HPLC and MS traces of pure peptide 23 (>95% as judged by peak area of RP-HPLC at 210 nm, 7% yield).  $R_t$  13.2 min;  $m/z$  520.2  $[M + 6H]^{6+}$  requires 520.3,  $m/z$  624.0  $[M + 5H]^{5+}$  requires 624.1,  $m/z$  779.8  $[M + 4H]^{4+}$  requires 779.9,  $m/z$  1039.3  $[M + 3H]^{3+}$  requires 1039.6. Mass deconvolution calculated at 3115.08 Da with standard deviation of 0.15; theoretical mass calculated at 3115.65 Da.

**DTPA-NK(D-biotin)VPNLRGDLQVLAQKVART-OH (24)**

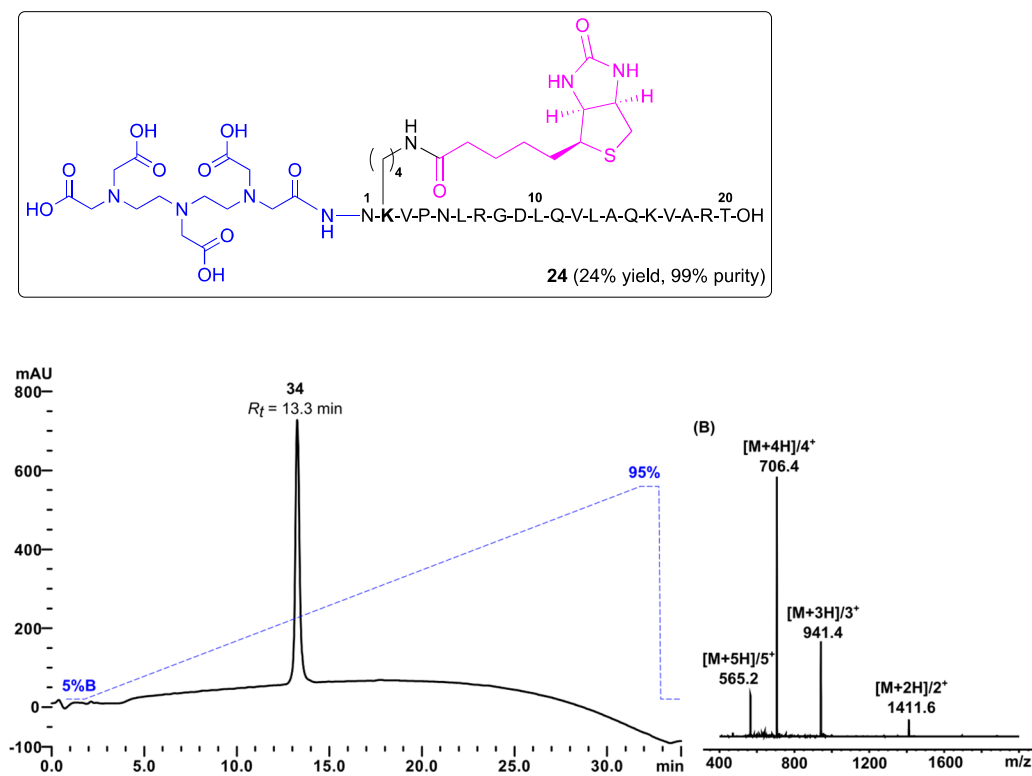

**Figure S12.** HPLC and MS traces of pure peptide 24 (ca 99% as judged by peak area of RP-HPLC at 210 nm, 24% yield).  $R_t$  13.3 min;  $m/z$  565.2  $[M + 5H]^{5+}$  requires 565.2,  $m/z$  706.4  $[M + 4H]^{4+}$  requires 706.2,  $m/z$  941.4  $[M + 3H]^{3+}$  requires 941.3,  $m/z$  1411.6  $[M + 2H]^{2+}$  requires 1411.4. Mass deconvolution calculated at 2821.25 Da with standard deviation of 0.25; theoretical mass calculated at 2820.77 Da.

DTPA-PEG<sub>2</sub>-CH<sub>2</sub>CO-NK(D-biotin)VPNLRGDLQVLAQKVART-OH (25)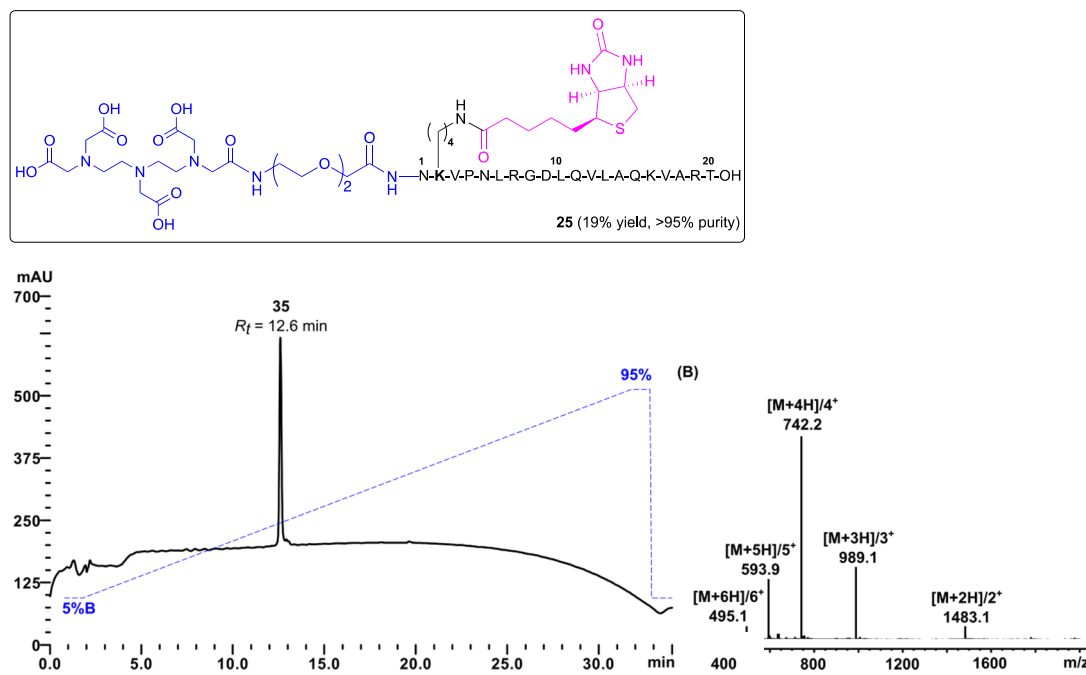

**Figure S13.** HPLC and MS traces of pure peptide 25 (>95% as judged by peak area of RP-HPLC at 210 nm, 19% yield).  $R_t$  12.6 min;  $m/z$  495.1  $[M + 6H]^{6+}$  requires 495.6,  $m/z$  593.9  $[M + 5H]^{5+}$  requires 594.5,  $m/z$  742.2  $[M + 4H]^{4+}$  requires 742.9,  $m/z$  989.1  $[M + 3H]^{3+}$  requires 990.1,  $m/z$  1483.1  $[M + 2H]^{2+}$  requires 1484.7. Mass deconvolution calculated at 2964.48 Da with standard deviation of 0.24; theoretical mass calculated at 2967.42 Da.

DTPA-PEG<sub>3</sub>-CH<sub>2</sub>CO-NK(D-biotin)VPNLRGDLQVLAQKVART-OH (26)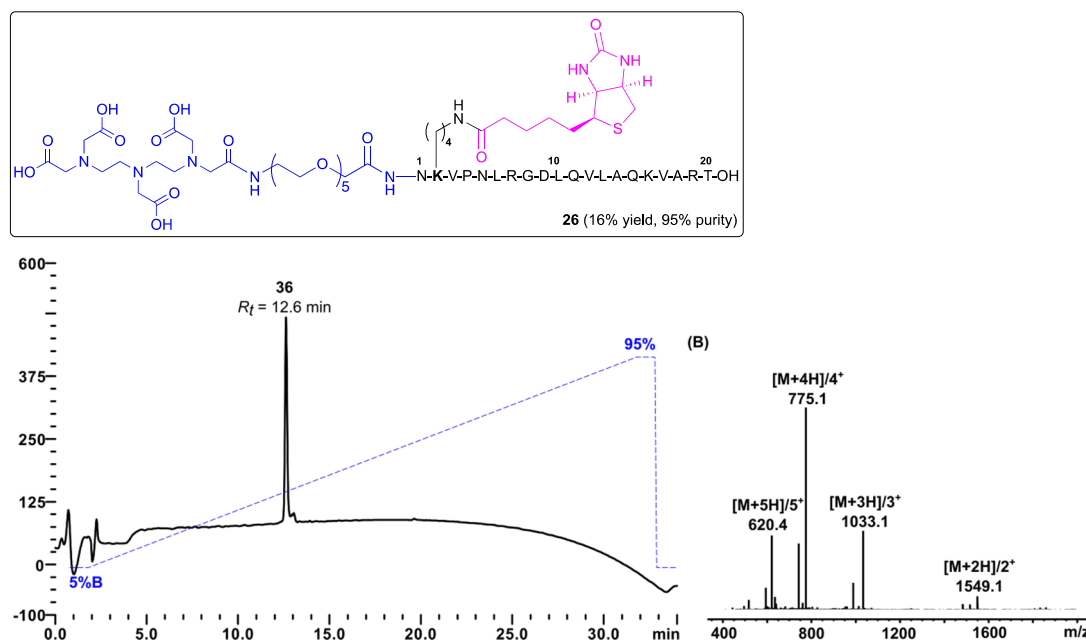

**Figure S14.** HPLC and MS traces of pure peptide 26 (ca 95% as judged by peak area of RP-HPLC at 210 nm, 16% yield).  $R_t$  12.6 min;  $m/z$  620.4  $[M + 5H]^{5+}$  requires 620.7,  $m/z$  775.1  $[M + 4H]^{4+}$  requires 775.7,  $m/z$  1033.1  $[M + 3H]^{3+}$  requires 1033.9,  $m/z$  1549.1  $[M + 2H]^{2+}$  requires 1550.3. Mass deconvolution calculated at 3096.48 Da with standard deviation of 0.36; theoretical mass calculated at 3098.58 Da.



DTPA-PEG<sub>5</sub>-CH<sub>2</sub>CH<sub>2</sub>CO-NK(D-biotin)VPNLRGDLQVLAQKVART-OH (27)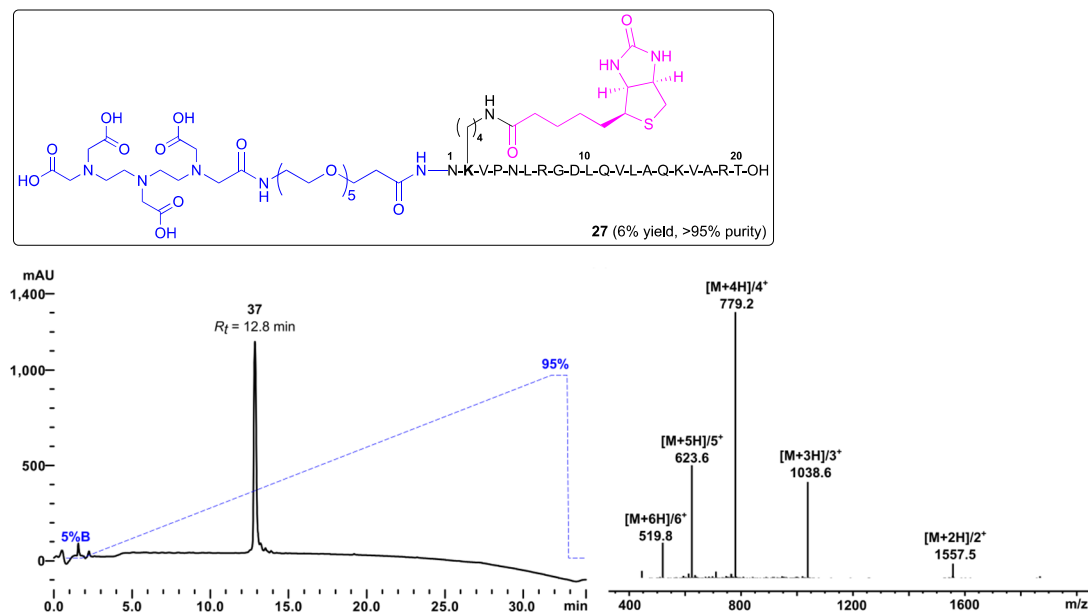

**Figure S15.** HPLC and MS traces of pure peptide 27 (>95% as judged by peak area of RP-HPLC at 210 nm, 6% yield).  $R_t$  12.8 min;  $m/z$  519.8  $[M + 6H]^{6+}$  requires 519.9,  $m/z$  623.6  $[M + 5H]^{5+}$  requires 623.7,  $m/z$  779.2  $[M + 4H]^{4+}$  requires 779.4,  $m/z$  1038.6  $[M + 3H]^{3+}$  requires 1038.9,  $m/z$  1557.5  $[M + 2H]^{2+}$  requires 1557.8. Mass deconvolution calculated at 3112.88 Da with standard deviation of 0.11; theoretical mass calculated at 3113.61 Da.

DTPA-PEG<sub>10</sub>-CH<sub>2</sub>CH<sub>2</sub>CO-NK(D-biotin)VPNLRGDLQVLAQKVART-OH (28)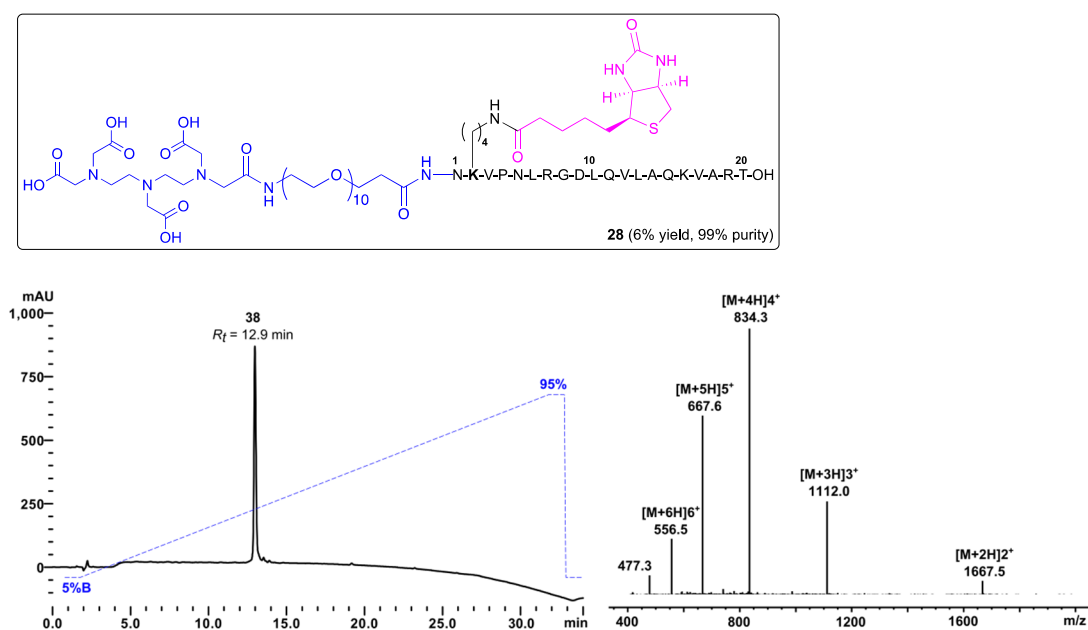

**Figure S16.** HPLC and MS traces of pure peptide 28 (ca 99% as judged by peak area of RP-HPLC at 210 nm, 6% yield).  $R_t$  12.9 min;  $m/z$  477.3  $[M + 7H]^{7+}$  requires 477.3,  $m/z$  556.5  $[M + 6H]^{6+}$  requires 556.6,  $m/z$  667.6  $[M + 5H]^{5+}$  requires 667.8,  $m/z$  834.3  $[M + 4H]^{4+}$  requires 834.5,  $m/z$  1112.0  $[M + 3H]^{3+}$  requires 1112.3,  $m/z$  1667.5  $[M + 2H]^{2+}$  requires 1667.9. Mass deconvolution calculated at 3333.04 Da with standard deviation of 0.11; theoretical mass calculated at 3333.87 Da.

DTPA-PEG<sub>15</sub>-CH<sub>2</sub>CH<sub>2</sub>CO-NK(D-biotin)VPNLRGDLQVLAQKVART-OH (29)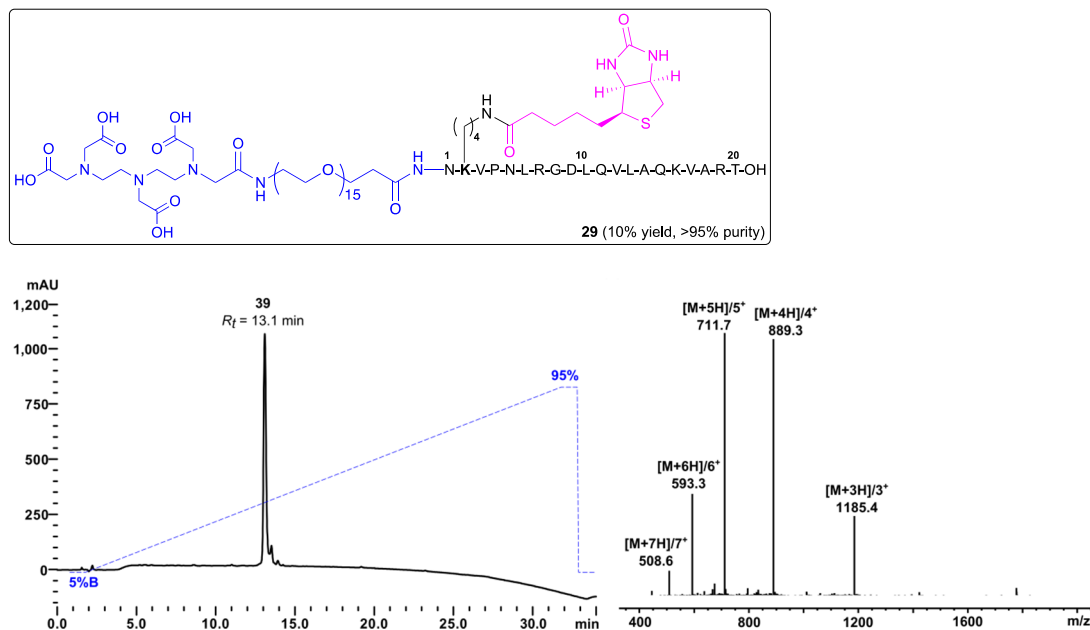

**Figure S17.** HPLC and MS traces of pure peptide 29 (>95% as judged by peak area of RP-HPLC at 210 nm, 10% yield).  $R_t$  13.1 min;  $m/z$  508.6  $[M+7H]^+$  requires 508.7,  $m/z$  593.3  $[M+6H]^+$  requires 593.4,  $m/z$  711.7  $[M+5H]^+$  requires 711.8,  $m/z$  889.3  $[M+4H]^+$  requires 889.5,  $m/z$  1185.4  $[M+3H]^+$  requires 1185.7. Mass deconvolution calculated at 3553.43 Da with standard deviation of 0.29; theoretical mass calculated at 3554.11 Da.

DTPA-PEG<sub>20</sub>-CH<sub>2</sub>CH<sub>2</sub>CO-NK(D-biotin)VPNLRGDLQVLAQKVART-OH (30)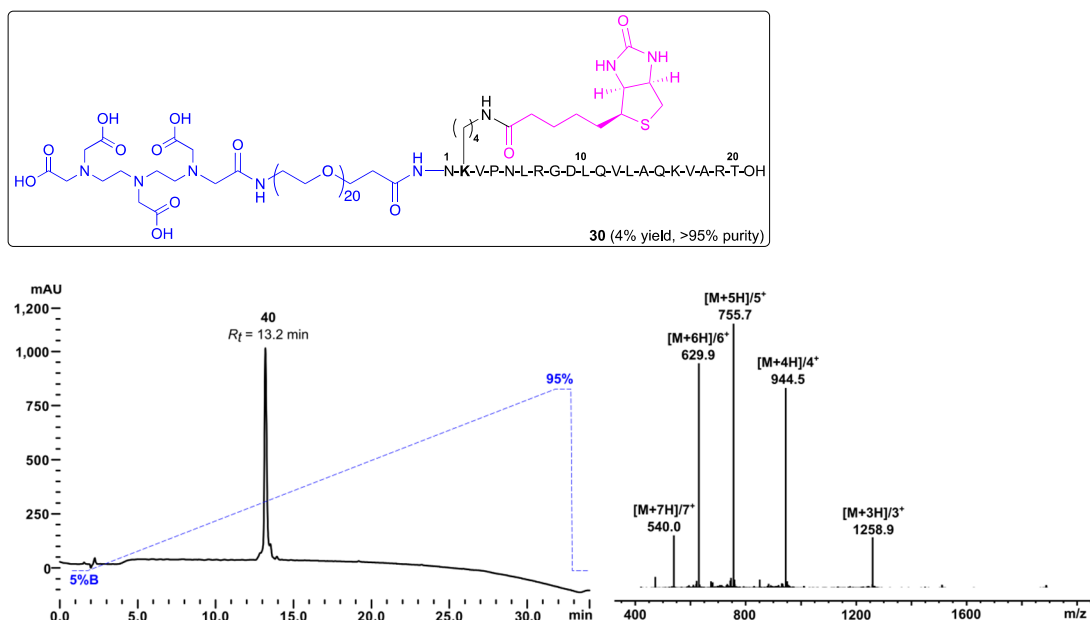

**Figure S18.** HPLC and MS traces of pure peptide 30 (>95% as judged by peak area of RP-HPLC at 210 nm, 4% yield).  $R_t$  13.2 min;  $m/z$  540.0  $[M+7H]^+$  requires 540.2,  $m/z$  629.9  $[M+6H]^+$  requires 630.1,  $m/z$  755.7  $[M+5H]^+$  requires 755.9,  $m/z$  944.5  $[M+4H]^+$  requires 944.6,  $m/z$  1258.9  $[M+3H]^+$  requires 1259.1. Mass deconvolution calculated at 3773.65 Da with standard deviation of 0.26; theoretical mass calculated at 3774.40 Da.
